# Supplementary material for: Meteorological Impacts of Offshore Wind Turbines as Simulated in the Weather Research and Forecasting Model
Source: Copernicus journal article supplement (doi:10.5194/wes-2024-53), 2024-05-07
Supplement: Supplementary file [file wes-2024-53-AC4-supplement.pdf]

**We have noticed that our previous answer to the reviewer's minor issue #6 had an error. The correct answer is below, and we have updated the text in the draft accordingly:**

*Line 294: if the downward heat flux is reduced, thus less heat comes down to the surface from the layer above it, how come "more heat is transferred to the surface"?*

**Thank you for catching this unclear statement. We have corrected the text to**

***"During stable conditions, heat flux is negative (downward). When heat flux is moderately reduced within the wind plant, it becomes more negative implying that more heat is transferred to the surface, which is consistent with the T2 changes of Figure 11. We also observe an increase in heat flux downwind of the wind plant of around 1.5 W m<sup>-2</sup> during stable conditions, implying that the cooling typical of stable conditions accelerates. No downwind effect on heat flux occurs during neutral and unstable conditions."***
